# Supplementary material
Source: PubMed Central journal article supplement (PMC5860284)
Supplement: kwx198weiwebmaterialfinal.pdf [file kwx198weiwebmaterialfinal.pdf]

## Supplemental Material

### Multimorbidity, mortality, and long-term physical functioning in three prospective cohorts of community-dwelling adults

Melissa Y. Wei, MD, MPH, SM<sup>1</sup>; Kenneth J. Mukamal, MD, MPH, MA<sup>2</sup>

<sup>1</sup>Division of General Medicine and Institute for Healthcare Policy and Innovation, University of Michigan, Ann Arbor, Michigan.

<sup>2</sup>Division of General Medicine, Beth Israel Deaconess Medical Center and Harvard Medical School, Boston, Massachusetts.

#### Web Appendix 1. Calculation of the multimorbidity-weighted index.

1. Assess for the presence of physician-diagnosed chronic diseases and conditions using a “yes” or “no” response.
2. Look up the MWI weightings for each chronic disease or condition using Supplemental Table 1 below. For chronic diseases and conditions not specifically listed, use the weighting “other diagnosis” in the first row.
3. Add up all the weighted chronic diseases and conditions to create the multimorbidity-weighted index.

#### Example:

1. Participant A has chronic conditions  $X_1$ ,  $X_2$  and  $X_3$ .
2. Using Supplemental Table 1, the MWI disease weightings for  $X_1$ ,  $X_2$  and  $X_3$  are  $\beta_{X_1}$ ,  $\beta_{X_2}$ , and  $\beta_{X_3}$ , respectively.
3. Person A has a multimorbidity-weighted index =  $\beta_{X_1} + \beta_{X_2} + \beta_{X_3}$ .

Full reference on the development and validation of the multimorbidity-weighted index:

Wei MY, Kawachi I, Okereke OI, Mukamal KJ. Diverse cumulative impact of chronic diseases on physical health-related quality of life: implications for a measure of multimorbidity. *American Journal of Epidemiology*. 2016;184(5):357-365.

**Web Table 1.** Multimorbidity-weighted index weightings for self-reported physician-diagnosed chronic diseases and conditions

| Chronic disease or condition                            | Multimorbidity-weighted index weighting |
|---------------------------------------------------------|-----------------------------------------|
| Other diagnosis                                         | -1.46                                   |
| <b>Cardiovascular</b>                                   |                                         |
| Angina                                                  | -2.20                                   |
| Aortic aneurysm                                         | -1.96                                   |
| Atrial fibrillation                                     | -1.33                                   |
| Automated Implantable Cardioverter Defibrillator (AICD) | -1.57                                   |
| Congestive heart failure                                | -4.77                                   |
| Coronary artery bypass graft surgery                    | -0.724                                  |
| High blood pressure                                     | -1.53                                   |
| Mitral valve prolapse                                   | -0.033                                  |
| Myocardial infarction                                   | -1.73                                   |
| Peripheral artery disease                               | -3.25                                   |
| Valvular heart disease                                  | -0.416                                  |
| Aortic insufficiency                                    |                                         |
| Aortic valve disease                                    |                                         |
| Aortic valve replacement                                |                                         |
| Aortic valve stenosis                                   |                                         |
| Aortic and mitral valve disorder                        |                                         |
| Mitral regurgitation                                    |                                         |
| Mitral stenosis                                         |                                         |
| Mitral valve disease                                    |                                         |
| Mitral valve replacement                                |                                         |
| Pulmonary valve disease                                 |                                         |
| Tricuspid valve disease                                 |                                         |
| Valve implant                                           |                                         |
| <b>Endocrine</b>                                        |                                         |
| Diabetes mellitus                                       | -2.67                                   |
| Elevated cholesterol                                    | -0.343                                  |
| Hypercholesterolemia                                    |                                         |
| Hyperlipidemia                                          |                                         |
| Hyperthyroidism                                         | -0.149                                  |
| Grave's disease                                         |                                         |
| Hypertriglyceridemia                                    | -0.692                                  |
| Hypothyroidism                                          | -0.808                                  |
| Thyroid nodule                                          | 0                                       |
| <b>Gastrointestinal</b>                                 |                                         |
| Barrett's esophagus                                     | -0.284                                  |
| Chronic hepatitis                                       | -0.293                                  |
| Hepatocellular disease                                  |                                         |
| Cirrhosis                                               | -4.30                                   |
| Liver transplant                                        |                                         |
| Colon polyp                                             | -0.010                                  |
| Diverticulosis                                          | -0.624                                  |
| Diverticulitis                                          |                                         |
| Gallstones                                              | -0.929                                  |
| Hepatitis not specified as chronic                      | -0.147                                  |
| Inflammatory bowel disease                              | -1.07                                   |
| Crohn's disease                                         |                                         |

| Chronic disease or condition               | Multimorbidity-weighted index weighting        |
|--------------------------------------------|------------------------------------------------|
| Ulcerative colitis                         |                                                |
| <b>Chronic disease or condition</b>        | <b>Multimorbidity-weighted index weighting</b> |
| Pancreatitis                               | -0.675                                         |
| Ulcer, peptic                              | -1.08                                          |
| <b>Hematologic</b>                         |                                                |
| Pernicious anemia                          | -1.82                                          |
| Venous thromboembolism                     | -1.98                                          |
| Pulmonary embolus                          |                                                |
| Deep venous thrombosis                     |                                                |
| <b>Immunologic</b>                         |                                                |
| Acquired Immune Deficiency Syndrome (AIDS) | -2.91                                          |
| <b>Integumentary</b>                       |                                                |
| Solar actinic keratosis                    | 0                                              |
| <b>Musculoskeletal</b>                     |                                                |
| Connective tissue disease                  | -3.02                                          |
| Sjogren's disease                          |                                                |
| Dermatomyositis                            |                                                |
| Polymyositis                               |                                                |
| Systemic lupus erythematosus               |                                                |
| Gout                                       | -1.34                                          |
| Herniated disc                             | -3.27                                          |
| Hip fracture                               | -3.56                                          |
| Hip replacement surgery                    | -3.55                                          |
| Knee replacement surgery                   | -9.11                                          |
| Osteoarthritis                             | -3.52                                          |
| Osteoporosis                               | -0.997                                         |
| Rheumatoid arthritis                       | -3.79                                          |
| Vertebral fracture                         | -2.07                                          |
| Wrist fracture                             | 0                                              |
| <b>Nervous</b>                             |                                                |
| Amyotrophic lateral sclerosis (ALS)        | -7.45                                          |
| Dementia                                   | -6.10                                          |
| Alzheimer disease                          |                                                |
| Migraine headache                          | -0.614                                         |
| Multiple sclerosis                         | -10.6                                          |
| Parkinson disease                          | -8.82                                          |
| Restless legs syndrome                     | -2.23                                          |
| Seizure disorder                           | -0.841                                         |
| Epilepsy                                   |                                                |
| Stroke                                     | -3.79                                          |
| Transient ischemic attack                  | -1.24                                          |
| <b>Oncologic</b>                           |                                                |
| Basal cell carcinoma                       | 0                                              |
| Bladder cancer                             | -0.99                                          |
| Breast cancer                              | -0.886                                         |

|                                                   |                                                |
|---------------------------------------------------|------------------------------------------------|
| Cervical cancer                                   | -0.723                                         |
| Colon cancer                                      | -1.18                                          |
| Leukemia                                          | -1.32                                          |
| Lymphoma                                          |                                                |
| <b>Chronic disease or condition</b>               | <b>Multimorbidity-weighted index weighting</b> |
| Lung cancer                                       | -6.25                                          |
| Melanoma                                          | 0                                              |
| Other cancer                                      | -1.76                                          |
| Ovarian cancer                                    | -1.87                                          |
| Prostate cancer                                   | -0.402                                         |
| Squamous cell carcinoma                           | 0                                              |
| Uterine cancer                                    | -0.753                                         |
| <b>Ophthalmologic</b>                             |                                                |
| Cataract                                          | -0.288                                         |
| Glaucoma                                          | -0.427                                         |
| Macular degeneration                              | -0.564                                         |
| <b>Oral</b>                                       |                                                |
| Periodontal disease                               | -0.164                                         |
| <b>Psychiatric</b>                                |                                                |
| Alcohol abuse                                     | -1.37                                          |
| Depression                                        | -1.29                                          |
| <b>Pulmonary</b>                                  |                                                |
| Asthma                                            | -1.62                                          |
| Chronic obstructive pulmonary disease (COPD)      | -4.32                                          |
| Chronic bronchitis                                |                                                |
| Emphysema                                         |                                                |
| <b>Renal</b>                                      |                                                |
| Chronic kidney disease                            | -3.98                                          |
| Glomerulonephritis                                |                                                |
| Kidney failure                                    |                                                |
| Kidney transplant                                 |                                                |
| Renal artery occlusion                            |                                                |
| Renal artery stenosis                             |                                                |
| Interstitial cystitis                             | -0.879                                         |
| Kidney stones                                     | -0.291                                         |
| <b>Reproductive</b>                               |                                                |
| Benign breast disease                             | 0                                              |
| Benign prostatic hyperplasia (BPH)                | 0                                              |
| Ectopic pregnancy                                 | 0                                              |
| Endometriosis                                     | -0.142                                         |
| Erectile dysfunction                              | -1.22                                          |
| Polycystic ovary syndrome                         | -0.640                                         |
| Premenstrual syndrome                             | -0.412                                         |
| Prostate surgery for benign prostatic hyperplasia | 0                                              |
| Uterine fibroid                                   | -0.029                                         |

**Web Figure 1.** Kaplan-Meier survival curves by unadjusted Multimorbidity-Weighted Index quartiles.

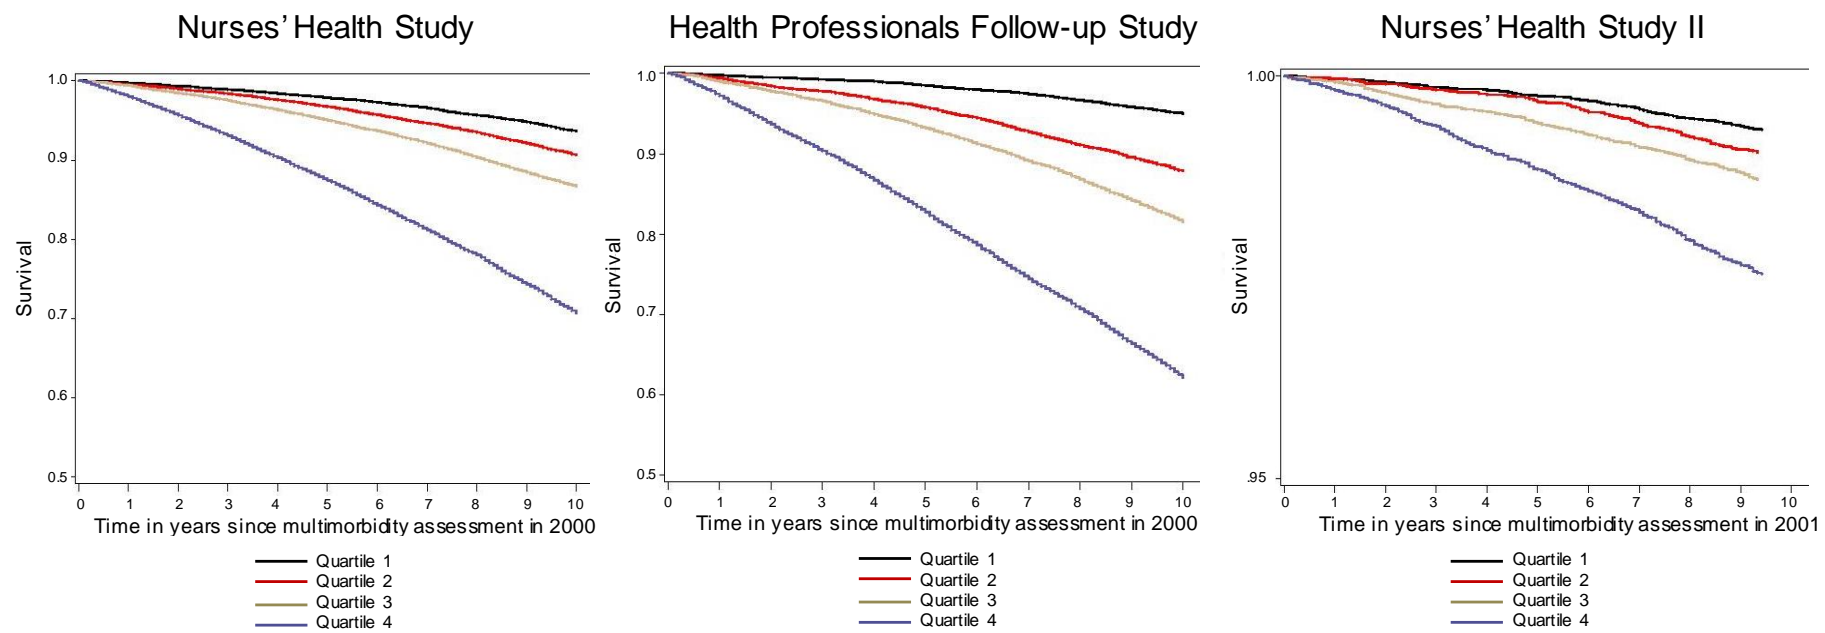

**Web Table 2.** Fully adjusted<sup>a</sup> hazard ratios for mortality after 10-year follow-up.

|                                           | Nurses' Health Study  | Health Professionals Follow-up Study | Nurses' Health Study II | Meta-analyzed combined cohorts |
|-------------------------------------------|-----------------------|--------------------------------------|-------------------------|--------------------------------|
| No. of participants                       | 92,352                | 32,476                               | 95,122                  | 219,950                        |
| Deaths                                    | 13,728                | 6,444                                | 1,320                   | 23,709                         |
| Model                                     | HR (95% CI)           | HR (95% CI)                          | HR (95% CI)             | HR (95% CI)                    |
| Multimorbidity- Weighted Index, quartiles |                       |                                      |                         |                                |
| Q4 vs Q1                                  | 3.10 (2.88, 3.33)     | 3.02 (2.67, 3.41)                    | 2.61 (2.04, 3.35)       | 3.05 (2.99, 3.11)              |
| Q3 vs Q1                                  | 1.59 (1.47, 1.71)     | 1.77 (1.56, 2.00)                    | 1.65 (1.526, 2.15)      | 1.63 (1.57, 1.70)              |
| Q2 vs Q1                                  | 1.31 (1.21, 1.42)     | 1.41 (1.24, 1.60)                    | 1.40 (1.105, 1.85)      | 1.34 (1.27, 1.41)              |
| Q1 (reference)                            | 1.0                   | 1.0                                  | 1.0                     | 1.0                            |
|                                           | <i>P</i> trend <0.001 | <i>P</i> trend <0.001                | <i>P</i> trend <0.001   | <i>P</i> trend <0.001          |
| Simple Disease Count, quartiles           |                       |                                      |                         |                                |
| Q4 vs Q1                                  | 2.60 (2.42, 2.79)     | 2.46 (2.09, 2.89)                    | 2.41 (1.87, 3.10)       | 2.57 (2.50, 2.63)              |
| Q3 vs Q1                                  | 1.51 (1.41, 1.63)     | 1.49 (1.27, 1.76)                    | 1.40 (1.05, 1.86)       | 1.50 (1.44, 1.57)              |
| Q2 vs Q1                                  | 1.22 (1.12, 1.33)     | 1.15 (0.96, 1.37)                    | 1.42 (1.07, 1.87)       | 1.22 (1.15, 1.29)              |
| Q1 (reference)                            | 1.0                   | 1.0                                  | 1.0                     | 1.0                            |
|                                           | <i>P</i> trend <0.001 | <i>P</i> trend <0.001                | <i>P</i> trend <0.001   | <i>P</i> trend <0.001          |
| Charlson Comorbidity Index <sup>b</sup>   |                       |                                      |                         |                                |
| Q4 vs. Q1-3                               | 2.41 (2.31, 2.52)     | 1.99 (1.88, 2.11)                    | N/A <sup>c</sup>        | 2.26 (2.23, 2.30)              |
| Q1-3 (reference)                          | 1.0                   | 1.0                                  |                         | 1.0                            |
|                                           | <i>P</i> trend <0.001 | <i>P</i> trend <0.001                |                         | <i>P</i> trend <0.001          |

Abbreviations: AIC, Akaike Information Criterion; CI, confidence interval; HR, hazard ratio; N/A, not available – not calculable; Q, quartile

<sup>a</sup> Adjusted for age, race, body mass index, smoking status, alcohol intake, geographic region

<sup>b</sup> Due to a strong left skew, quartiles 1-3 serve as referent group, and the Charlson index cannot be directly compared with the MWI and simple disease count, where quartile 1 serves as the referent group.

<sup>c</sup> Charlson index not computable in quartiles due to a strong left skew.

**Web Figure 2.** Future physical functioning by participant characteristics and adjusted overall estimate for each point increase in the standardized Multimorbidity-Weighted Index.

4-year physical functioning in the Nurses' Health Study

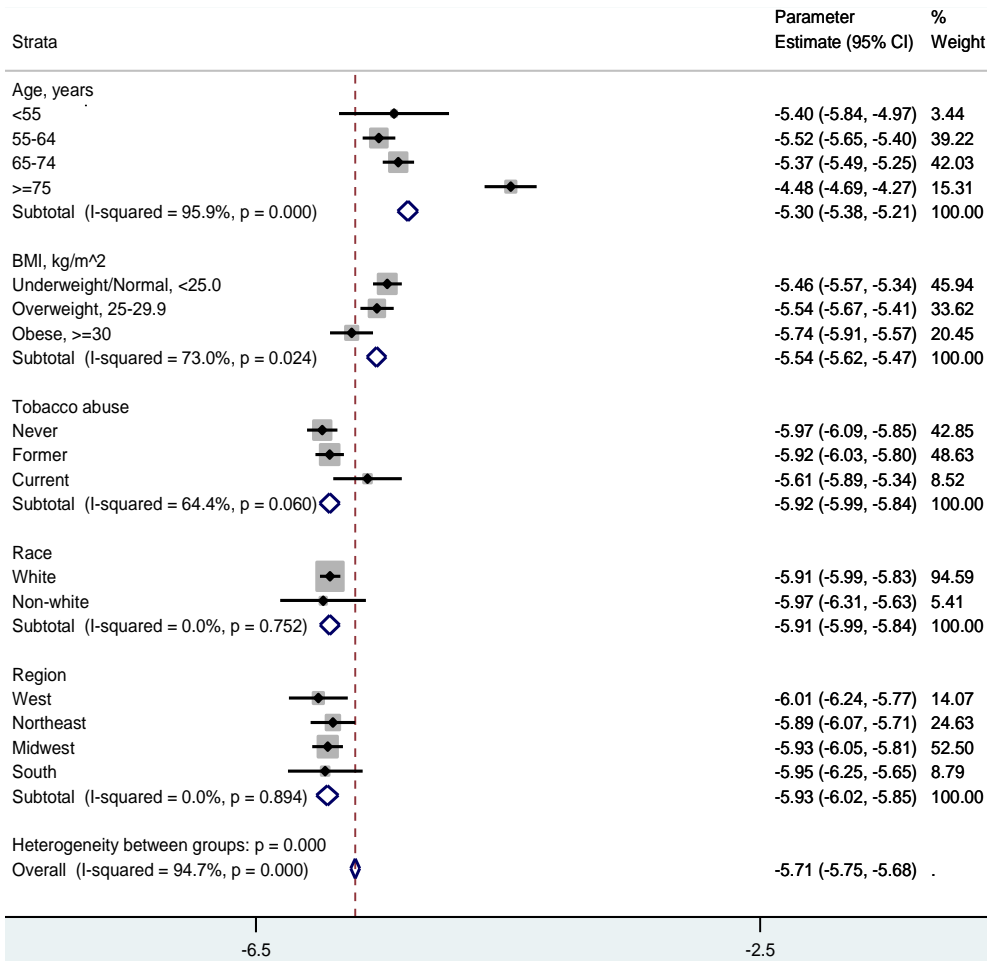

8-year physical functioning in the Health Professionals Follow-up Study

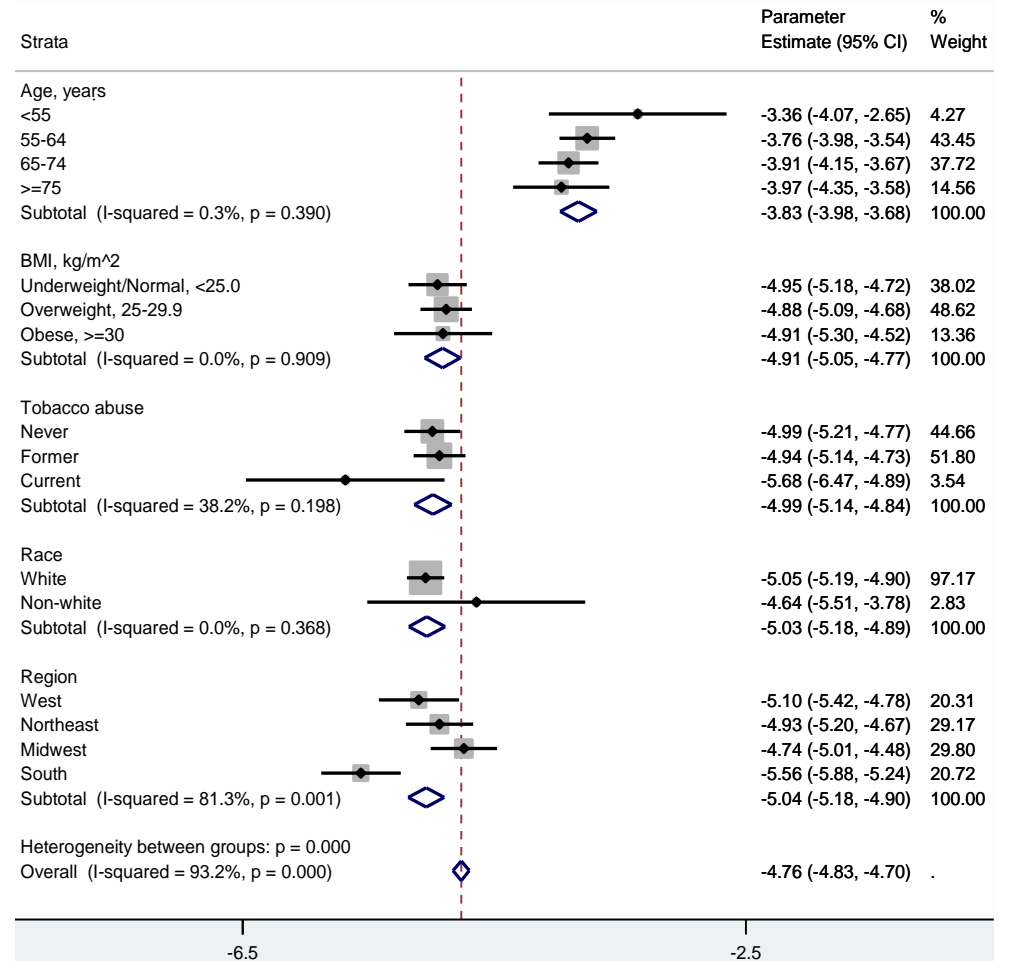

<sup>a</sup> Adjusted for age, race, body mass index, tobacco abuse, and geographic region
